# Supplementary material for: Improved inherited peripheral neuropathy genetic diagnosis by whole-exome sequencing
Source: PubMed Central journal article supplement (PMC4367087; doi:10.1002/mgg3.126), 2015-01-14
Supplement: mgg30003-0143-sd1.pdf [file mgg30003-0143-sd1.pdf]

A

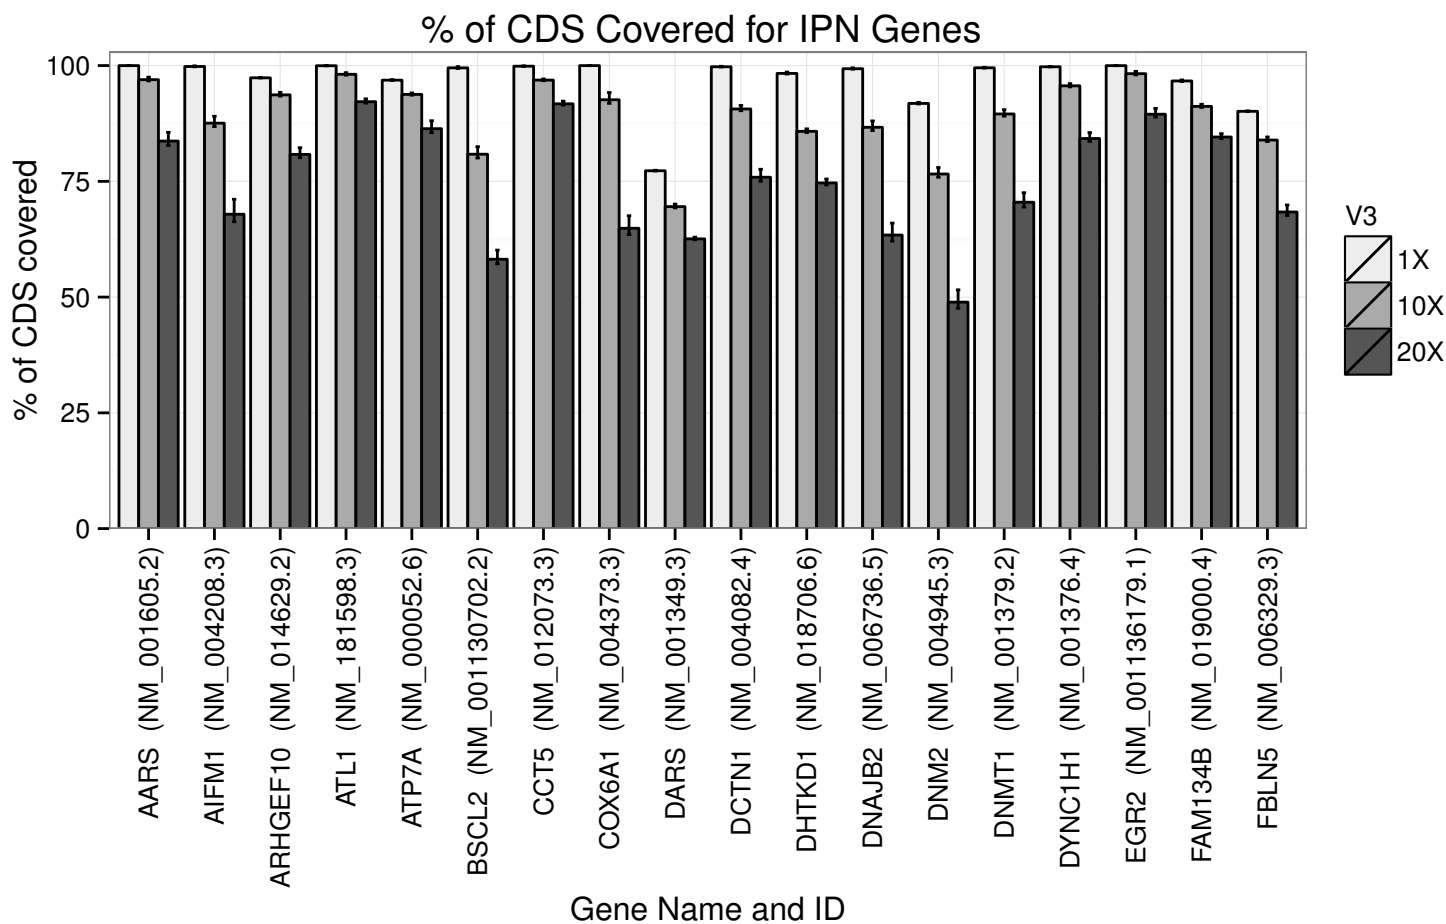

B

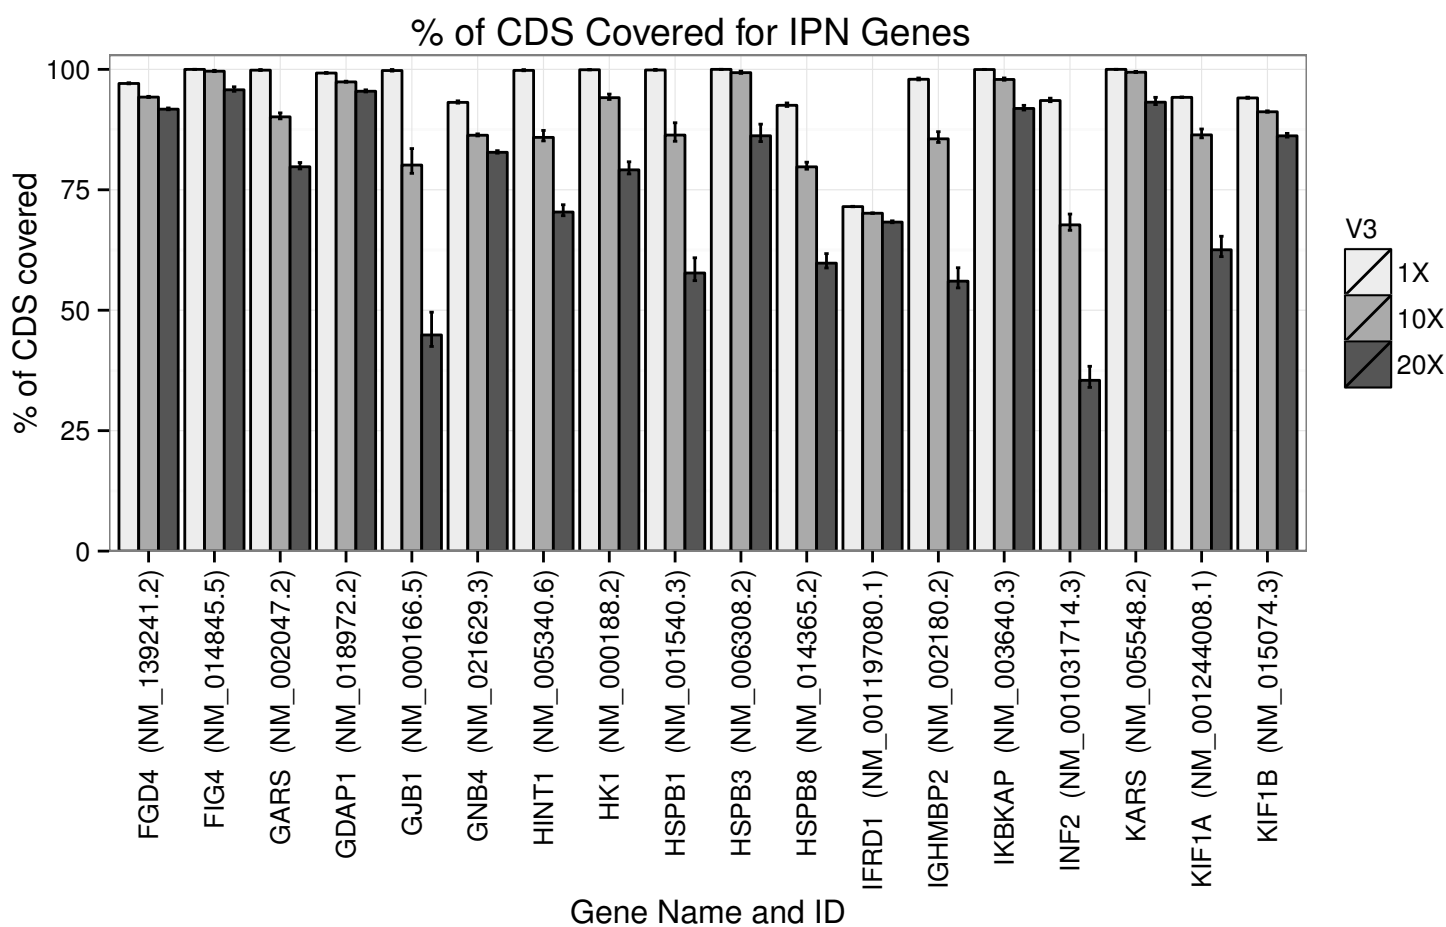

**Supplementary Figure S1 A - B:** Mean percentage of the CDS covered by WES in 112 samples at defined read-depths of 1X, 10X and 20X. Error bars show 95% confidence interval.
